# Supplementary material for: Global covariation of forest age transitions with the net carbon balance
Source: Research Square preprint supplement (doi:10.21203/rs.3.rs-4655317/v1), 2024-08-12
Supplement: Supplementary file 1 [file 6e3bf7a03060d96076b27a9c.pdf]

1 **Supplementary materials**

2 **Table S1.** Description of the stand-replaced and gradually ageing forests' processes.

|                              | <b>Stand-replaced forests</b>                                                                                                                                                                                                                                                      | <b>Gradually ageing forests</b>                                                                                                                                                                                     |
|------------------------------|------------------------------------------------------------------------------------------------------------------------------------------------------------------------------------------------------------------------------------------------------------------------------------|---------------------------------------------------------------------------------------------------------------------------------------------------------------------------------------------------------------------|
| <b>Process description</b>   | Stand-replaced forests emerge from substantial disturbances, transitioning rapidly from young growth to mature stages.                                                                                                                                                             | Gradually ageing forests typically involve stable management practices, such as thinning, with minimal substantial disturbances. These practices vary and do not involve stand replacements.                        |
| <b>Forest age transition</b> | Forests experience an age difference of less than ten years, indicating stand-replacement followed by regrowth between 2010 and 2020. Stand-replaced forests between 2010 and 2020 can be characterised as young, maturing, mature or old-growth before a stand-replacement event. | A gradual ageing process over ten years is assumed for forests without stand replacement between 2010 and 2020. This includes naturally ageing forests planted before 2010 and regrowth from pre-2010 disturbances. |

3 **Table S2.** Total global forest area across age classes for 2010 and 2020 and the net global area changes for 2010-2020. Area estimates  
4 are expressed in billions of hectares. The median values and the quantiles 5% and 95% across the 20 members are reported.

|                      | Young forests                        | Maturing forests                     |                                      |                                      |                                      | Mature forests                       |                                      |                                      |                                        |                                         |                                         | Old-growth forests                    |  |
|----------------------|--------------------------------------|--------------------------------------|--------------------------------------|--------------------------------------|--------------------------------------|--------------------------------------|--------------------------------------|--------------------------------------|----------------------------------------|-----------------------------------------|-----------------------------------------|---------------------------------------|--|
|                      | 0-20                                 | 21-40                                | 41-60                                | 61-80                                | 81-100                               | 101-120                              | 121-140                              | 141-160                              | 161-180                                | 180-200                                 | 201-300                                 | >300                                  |  |
| Total area in 2010   | 0.85 <sup>0.95</sup> <sub>0.67</sub> | 0.25 <sup>0.31</sup> <sub>0.22</sub> | 0.20 <sup>0.26</sup> <sub>0.17</sub> | 0.25 <sup>0.31</sup> <sub>0.19</sub> | 0.29 <sup>0.35</sup> <sub>0.24</sub> | 0.30 <sup>0.33</sup> <sub>0.26</sub> | 0.27 <sup>0.34</sup> <sub>0.12</sub> | 0.14 <sup>0.24</sup> <sub>0.04</sub> | 0.051 <sup>0.10</sup> <sub>0.017</sub> | 0.021 <sup>0.038</sup> <sub>0.008</sub> | 0.020 <sup>0.032</sup> <sub>0.006</sub> | 1.073 <sup>1.16</sup> <sub>0.97</sub> |  |
| Total area in 2020   | 0.79 <sup>0.91</sup> <sub>0.58</sub> | 0.29 <sup>0.35</sup> <sub>0.22</sub> | 0.20 <sup>0.24</sup> <sub>0.17</sub> | 0.22 <sup>0.28</sup> <sub>0.16</sub> | 0.27 <sup>0.33</sup> <sub>0.22</sub> | 0.29 <sup>0.34</sup> <sub>0.25</sub> | 0.29 <sup>0.32</sup> <sub>0.20</sub> | 0.20 <sup>0.30</sup> <sub>0.06</sub> | 0.079 <sup>0.15</sup> <sub>0.026</sub> | 0.030 <sup>0.060</sup> <sub>0.011</sub> | 0.028 <sup>0.044</sup> <sub>0.010</sub> | 1.04 <sup>1.12</sup> <sub>0.94</sub>  |  |
| Absolute net changes | -0.060                               | +0.043                               | -0.008                               | -0.033                               | -0.013                               | +0.019                               | +0.019                               | +0.064                               | +0.028                                 | +0.0092                                 | +0.0074                                 | -0.036                                |  |
| Relative net changes | -7.21%                               | +17.20%                              | -3.42%                               | -13.15%                              | -3.75%                               | +0.65%                               | +17.10%                              | +71.56%                              | +59.46%                                | +42.74%                                 | +38.10%                                 | -3.38%                                |  |

5 **Table S3.** Area-weighted forest age for 2010 and 2020 across the eleven TRANSCOM-land  
6 regions (Fig. S3). The difference between forest age in 2020 and 2010 is also reported. The  
7 median values and the quantiles 5% and 95% across the 20 members are reported.

| Region                   | Forest age 2010                            | Forest age 2020                            | Forest age difference                    |
|--------------------------|--------------------------------------------|--------------------------------------------|------------------------------------------|
| <b>Eurasia Boreal</b>    | 106.47 <sup>116.09</sup> <sub>85.35</sub>  | 113.31 <sup>122.72</sup> <sub>92.45</sub>  | +6.83 <sup>+7.20</sup> <sub>+6.63</sub>  |
| <b>NA Boreal</b>         | 103.90 <sup>115.92</sup> <sub>84.49</sub>  | 113.18 <sup>125.16</sup> <sub>93.87</sub>  | +9.28 <sup>+9.39</sup> <sub>+9.24</sub>  |
| <b>Eurasia Temperate</b> | 53.96 <sup>63.62</sup> <sub>0.16</sub>     | 62.48 <sup>72.65</sup> <sub>49.41</sub>    | +8.62 <sup>+9.06</sup> <sub>+7.47</sub>  |
| <b>Europe</b>            | 68.93 <sup>82.50</sup> <sub>60.72</sub>    | 77.45 <sup>90.78</sup> <sub>69.08</sub>    | +8.52 <sup>+8.66</sup> <sub>+8.24</sub>  |
| <b>NA temperate</b>      | 86.88 <sup>93.07</sup> <sub>73.74</sub>    | 94.72 <sup>100.89</sup> <sub>81.24</sub>   | +7.87 <sup>+8.00</sup> <sub>+7.69</sub>  |
| <b>SA Temperate</b>      | 74.89 <sup>91.76</sup> <sub>53.62</sub>    | 80.30 <sup>95.96</sup> <sub>61.11</sub>    | +6.63 <sup>+7.52</sup> <sub>+4.10</sub>  |
| <b>SA tropical</b>       | 238.52 <sup>247.36</sup> <sub>220.15</sub> | 233.68 <sup>242.24</sup> <sub>217.34</sub> | − 4.29 <sup>−3.05</sup> <sub>−5.86</sub> |
| <b>Tropical Asia</b>     | 136.95 <sup>147.23</sup> <sub>116.63</sub> | 128.72 <sup>137.16</sup> <sub>111.44</sub> | − 7.09 <sup>−4.78</sup> <sub>−9.41</sub> |
| <b>Northern Africa</b>   | 73.89 <sup>89.87</sup> <sub>60.71</sub>    | 78.24 <sup>92.26</sup> <sub>64.67</sub>    | +4.10 <sup>+5.57</sup> <sub>+1.44</sub>  |
| <b>Southern Africa</b>   | 84.10 <sup>94.45</sup> <sub>71.49</sub>    | 88.77 <sup>98.06</sup> <sub>76.09</sub>    | +4.50 <sup>+5.17</sup> <sub>+2.84</sub>  |
| <b>Australia</b>         | 60.96 <sup>83.36</sup> <sub>42.66</sub>    | 68.72 <sup>91.19</sup> <sub>49.87</sub>    | +7.64 <sup>+8.00</sup> <sub>+6.64</sub>  |

9 **Table S4.** Total NEE for 2010 and 2020 across TRANSCOM-Land regions. NEE changes  
10 between 2020 and 2010 have also been reported. The estimates are expressed in PgC year<sup>-1</sup>. The  
11 median values and the quantiles 5% and 95% across the GCB2023 members are reported. For  
12 total NEE, a positive sign means carbon source, while it means a decrease in carbon sink or  
13 increase in carbon source for NEE changes and vice-versa. A forest mask was applied before  
14 doing the area-weighted total estimates.

| Region            | NEE 2010                 | NEE 2020                 | NEE changes               |
|-------------------|--------------------------|--------------------------|---------------------------|
| Australia         | $-0.18_{-0.38}^{-0.072}$ | $-0.12_{-0.21}^{+0.020}$ | $+0.11_{-0.026}^{+0.23}$  |
| Eurasia Boreal    | $-0.56_{-0.85}^{-0.32}$  | $-0.46_{-0.90}^{-0.19}$  | $+0.065_{-0.12}^{+0.25}$  |
| Eurasia Temperate | $-0.76_{-1.35}^{-0.27}$  | $-0.62_{-1.36}^{-0.20}$  | $+0.019_{-0.17}^{+0.35}$  |
| Europe            | $-0.66_{-1.03}^{-0.17}$  | $-0.45_{-0.78}^{-0.058}$ | $+0.061_{-0.14}^{+0.52}$  |
| NA Boreal         | $-0.36_{-0.53}^{-0.11}$  | $-0.33_{-0.48}^{-0.24}$  | $+0.0011_{-0.14}^{+0.10}$ |
| NA Temperate      | $-0.43_{-0.90}^{+0.054}$ | $-0.72_{-1.098}^{+0.10}$ | $-0.084_{-0.50}^{+0.11}$  |
| Northern Africa   | $-0.053_{-0.32}^{+0.23}$ | $-0.059_{-0.26}^{+0.37}$ | $+0.0098_{-0.22}^{+0.26}$ |
| SA Temperate      | $-0.21_{-0.60}^{+0.20}$  | $-0.31_{-0.41}^{+0.32}$  | $+0.063_{-0.27}^{+0.26}$  |
| SA Tropical       | $-0.20_{-0.36}^{+0.30}$  | $+0.051_{-0.47}^{+0.27}$ | $+0.064_{-0.30}^{+0.56}$  |
| Southern Africa   | $-0.075_{-0.29}^{+0.15}$ | $+0.097_{-0.20}^{+0.31}$ | $+0.15_{-0.033}^{+0.43}$  |
| Tropical Asia     | $-0.27_{-0.90}^{+0.11}$  | $-0.26_{-0.90}^{+0.063}$ | $-0.023_{-0.17}^{+0.023}$ |
| Global            | $-4.22_{-4.65}^{-2.72}$  | $-3.51_{-4.61}^{-2.18}$  | $+0.38_{+0.030}^{+0.86}$  |

16 **Table S5.** Regional fraction of gradually ageing and stand-replaced forests and their ratio.  
 17 Fraction estimates are relative to the total area of gradually ageing and stand-replaced forests.  
 18 Total area estimates are shown between brackets and are expressed in billions of hectares. The  
 19 median values and the quantiles 5% and 95% across the 20 members are reported.

| Region                   | Fraction of gradually ageing                                                          | Fraction of stand-replaced                                                                | Area ratio                                 |
|--------------------------|---------------------------------------------------------------------------------------|-------------------------------------------------------------------------------------------|--------------------------------------------|
| <b>Eurasia Boreal</b>    | 0.17 <sup>0.17</sup> <sub>0.16</sub><br>(0.56 <sup>0.56</sup> <sub>0.56</sub> )       | 0.082 <sup>0.11</sup> <sub>0.064</sub><br>(0.020 <sup>0.020</sup> <sub>0.019</sub> )      | 0.035 <sup>0.035</sup> <sub>0.035</sub>    |
| <b>NA Boreal</b>         | 0.070 <sup>0.072</sup> <sub>0.069</sub><br>(0.24 <sup>0.24</sup> <sub>0.24</sub> )    | 0.0096 <sup>0.012</sup> <sub>0.0073</sub><br>(0.0023 <sup>0.023</sup> <sub>0.0022</sub> ) | 0.0097 <sup>0.0097</sup> <sub>0.0097</sub> |
| <b>Eurasia Temperate</b> | 0.065 <sup>0.066</sup> <sub>0.061</sub><br>(0.22 <sup>0.22</sup> <sub>0.20</sub> )    | 0.089 <sup>0.12</sup> <sub>0.073</sub><br>(0.021 <sup>0.038</sup> <sub>0.015</sub> )      | 0.097 <sup>0.19</sup> <sub>0.066</sub>     |
| <b>Europe</b>            | 0.10 <sup>0.11</sup> <sub>0.10</sub><br>(0.35 <sup>0.35</sup> <sub>0.35</sub> )       | 0.029 <sup>0.041</sup> <sub>0.024</sub><br>(0.0070 <sup>0.083</sup> <sub>0.068</sub> )    | 0.020 <sup>0.024</sup> <sub>0.019</sub>    |
| <b>NA temperate</b>      | 0.094 <sup>0.095</sup> <sub>0.092</sub><br>(0.31 <sup>0.32</sup> <sub>0.31</sub> )    | 0.052 <sup>0.069</sup> <sub>0.047</sub><br>(0.012 <sup>0.016</sup> <sub>0.011</sub> )     | 0.039 <sup>0.053</sup> <sub>0.036</sub>    |
| <b>SA Temperate</b>      | 0.048 <sup>0.049</sup> <sub>0.047</sub><br>(0.16 <sup>0.16</sup> <sub>0.16</sub> )    | 0.045 <sup>0.069</sup> <sub>0.036</sub><br>(0.012 <sup>0.015</sup> <sub>0.0080</sub> )    | 0.072 <sup>0.094</sup> <sub>0.049</sub>    |
| <b>SA tropical</b>       | 0.19 <sup>0.20</sup> <sub>0.19</sub><br>(0.64 <sup>0.65</sup> <sub>0.64</sub> )       | 0.11 <sup>0.13</sup> <sub>0.097</sub><br>(0.028 <sup>0.032</sup> <sub>0.021</sub> )       | 0.043 <sup>0.050</sup> <sub>0.032</sub>    |
| <b>Tropical Asia</b>     | 0.086 <sup>0.091</sup> <sub>0.085</sub><br>(0.29 <sup>0.31</sup> <sub>0.28</sub> )    | 0.25 <sup>0.27</sup> <sub>0.21</sub><br>(0.062 <sup>0.073</sup> <sub>0.041</sub> )        | 0.21 <sup>0.27</sup> <sub>0.13</sub>       |
| <b>Northern Africa</b>   | 0.079 <sup>0.086</sup> <sub>0.074</sub><br>(0.26 <sup>0.30</sup> <sub>0.24</sub> )    | 0.21 <sup>0.25</sup> <sub>0.11</sub><br>(0.050 <sup>0.072</sup> <sub>0.018</sub> )        | 0.19 <sup>0.30</sup> <sub>0.064</sub>      |
| <b>Southern Africa</b>   | 0.079 <sup>0.082</sup> <sub>0.076</sub><br>(0.27 <sup>0.28</sup> <sub>0.25</sub> )    | 0.10 <sup>0.13</sup> <sub>0.069</sub><br>(0.025 <sup>0.040</sup> <sub>0.015</sub> )       | 0.093 <sup>0.16</sup> <sub>0.054</sub>     |
| <b>Australia</b>         | 0.014 <sup>0.015</sup> <sub>0.014</sub><br>(0.049 <sup>0.050</sup> <sub>0.047</sub> ) | 0.022 <sup>0.026</sup> <sub>0.017</sub><br>(0.0053 <sup>0.0071</sup> <sub>0.0035</sub> )  | 0.11 <sup>0.15</sup> <sub>0.070</sub>      |

20  
 21  
 22

23 **Table S6.** The total area of gradually ageing and stand-replaced forests per age class. The  
24 median values and the quantiles 5% and 95% across the 20 members are reported.

|                                     | <b>Young forests<br/>(0-20 years)</b> | <b>Maturing forests<br/>(21-80 years)</b> | <b>Mature forests<br/>(81-200 years)</b> | <b>Old-growth forests<br/>(&gt;200 years)</b> |
|-------------------------------------|---------------------------------------|-------------------------------------------|------------------------------------------|-----------------------------------------------|
| <b>Gradually<br/>ageing forests</b> | 0.69 <sup>0.76</sup> <sub>0.60</sub>  | 0.68 <sup>0.75</sup> <sub>0.60</sub>      | 1.056 <sup>1.15</sup> <sub>0.88</sub>    | 1.059 <sup>1.12</sup> <sub>0.99</sub>         |
| <b>Stand-replaced<br/>forests</b>   | 0.15 <sup>0.23</sup> <sub>0.093</sub> | 0.032 <sup>0.039</sup> <sub>0.024</sub>   | 0.035 <sup>0.036</sup> <sub>0.032</sub>  | 0.035 <sup>0.043</sup> <sub>0.030</sub>       |

25 **Table S7.** Total carbon stocks and changes of gradually ageing and stand-replaced forests across  
26 age classes. Total estimates are expressed in PgC, while the stock changes are expressed in PgC  
27 year<sup>-1</sup>. The median values and the quantiles 5% and 95% across the 20 members are reported.

|                                                   | <b>Young forests<br/>(0-20 years)</b>     | <b>Maturing<br/>forests (21-80<br/>years)</b> | <b>Mature<br/>forests (81-<br/>200 years)</b> | <b>Old-growth<br/>forests (&gt;200<br/>years)</b> | <b>All age classes</b>                     |
|---------------------------------------------------|-------------------------------------------|-----------------------------------------------|-----------------------------------------------|---------------------------------------------------|--------------------------------------------|
| <b>AGC<br/>gradually<br/>ageing forests</b>       | 21.29 <sup>25.46</sup> <sub>18.82</sub>   | 36.75 <sup>41.71</sup> <sub>31.72</sub>       | 67.44 <sup>88.87</sup> <sub>52.18</sub>       | 138.92 <sup>168.92</sup> <sub>107.28</sub>        | 262.35 <sup>318.29</sup> <sub>214.10</sub> |
| <b>AGC stand-<br/>replaced<br/>forests</b>        | 2.18 <sup>3.86</sup> <sub>1.58</sub>      | 1.13 <sup>1.28</sup> <sub>0.96</sub>          | 1.72 <sup>2.23</sup> <sub>1.38</sub>          | 2.40 <sup>2.82</sup> <sub>1.74</sub>              | 7.72 <sup>9.02</sup> <sub>6.50</sub>       |
| <b>AGC changes<br/>stand-replaced<br/>forests</b> | +0.073 <sup>+0.13</sup> <sub>+0.033</sub> | +0.11 <sup>+0.17</sup> <sub>+0.089</sub>      | +0.10 <sup>+0.11</sup> <sub>+0.097</sub>      | +0.15 <sup>+0.18</sup> <sub>+0.12</sub>           | +0.43 <sup>+0.52</sup> <sub>+0.39</sub>    |

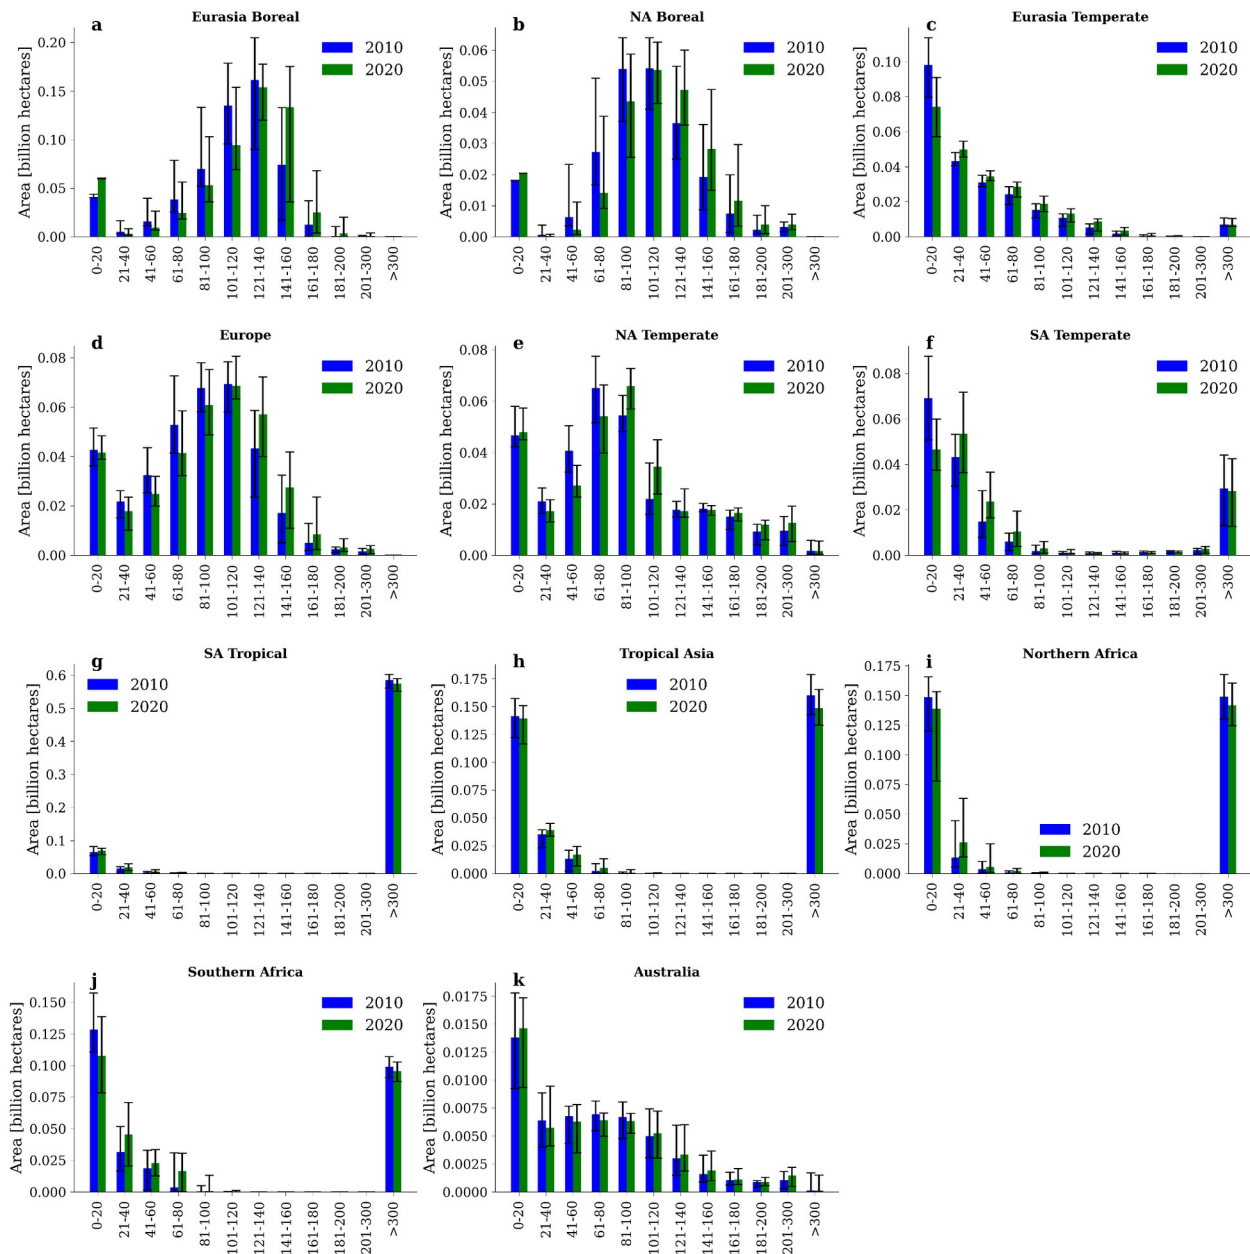

**Fig. S1.** The total area of each forest age class for 2010 (in blue) and 2020 (in green) across the eleven TRANSCOM-Land regions (Fig. S3). The total area represents the median values across the 20 members, and the error bars represent the 5% and 95% quantiles of the total areas across the 20 members.

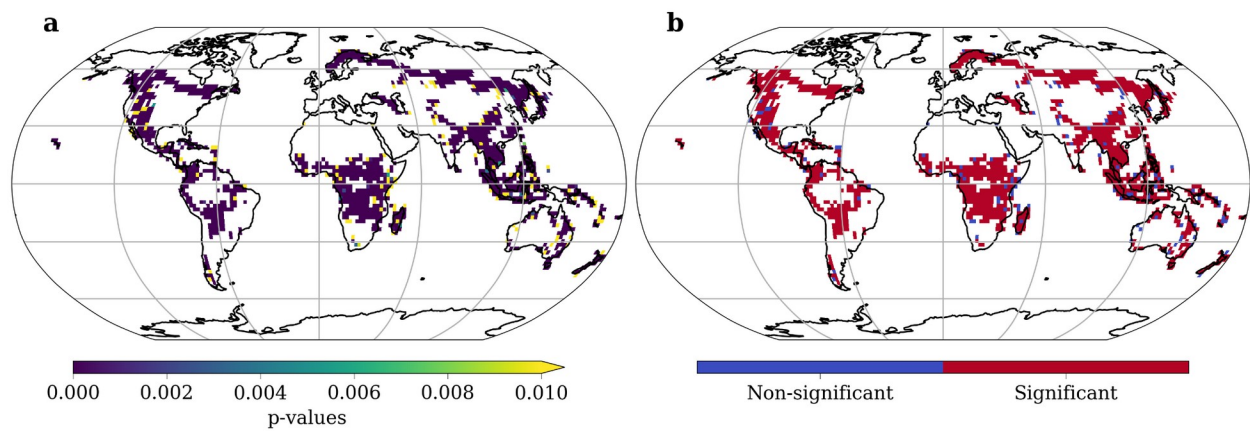

**Fig. S2.** Significant level of the role of management type on the relationship between forest age and biomass (see methods) within a 2x2 spatial window.



### Cost Range, USA - Forest harvest and regrowth

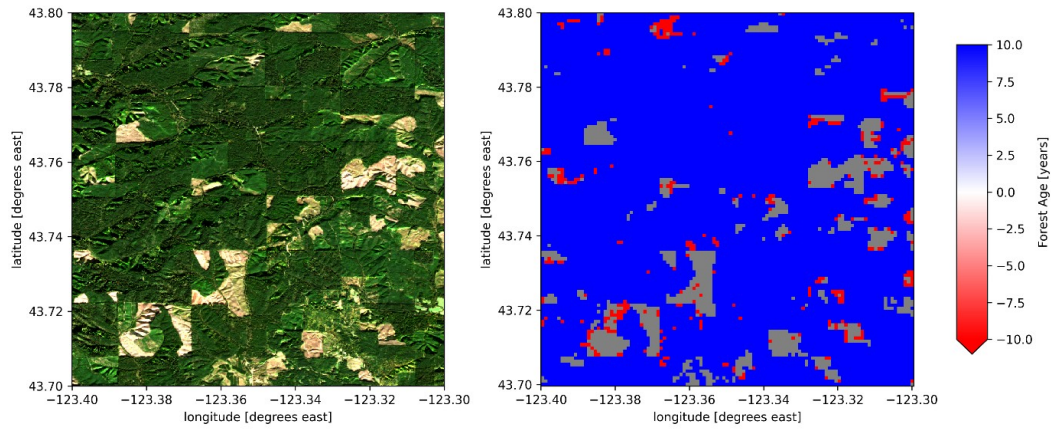

### Scandinavian Peninsula - Plantation

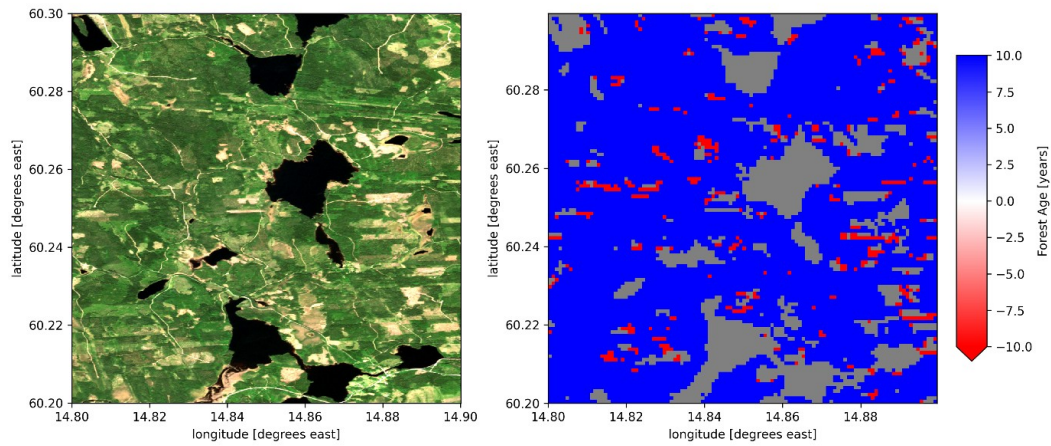

### Amazon, BR - Secondary forest regrowth

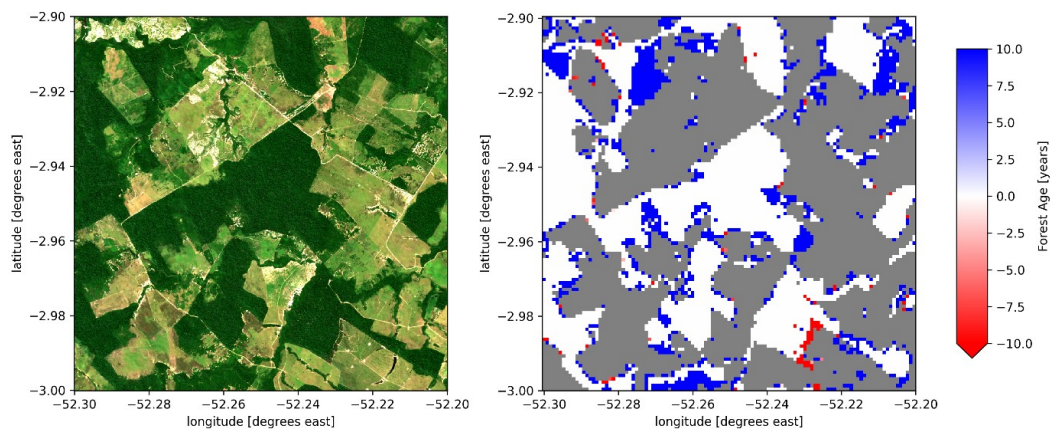

**Fig. S3.** The GAMlv2.0 forest age product at native resolution (i.e., 100m pixel size) provides a detailed view of substantial changes in forest age between 2010 and 2020, enhancing the precision of our analysis.

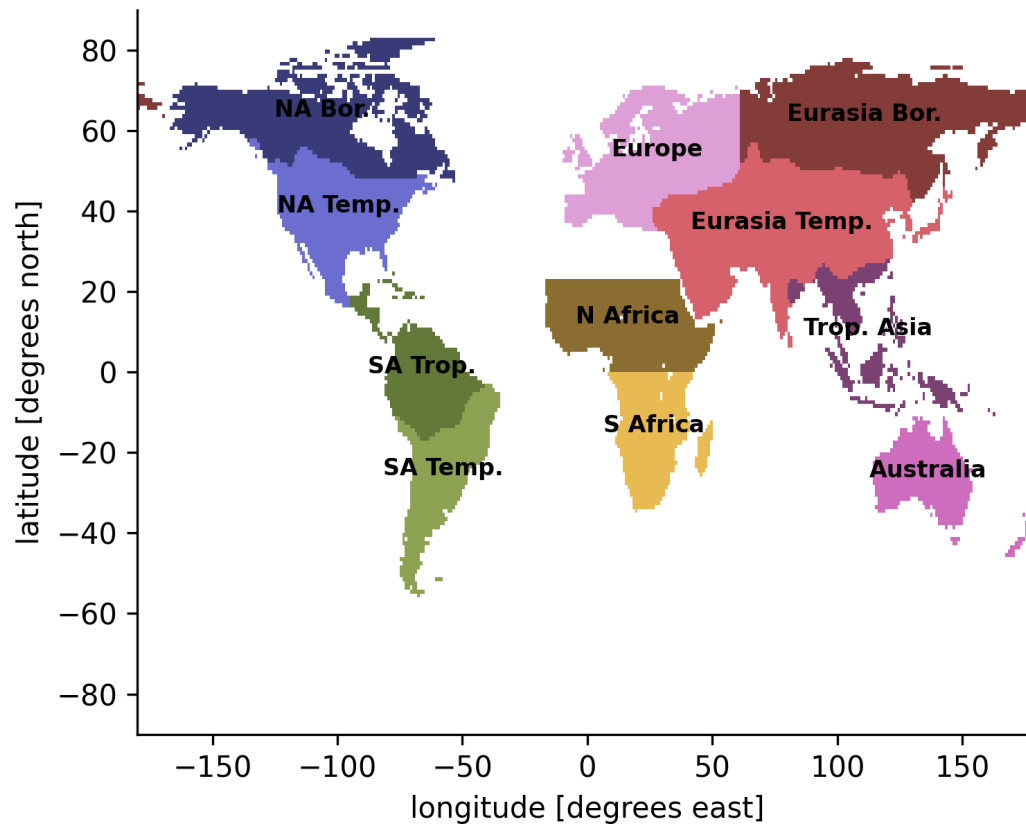

**Fig. S4.** Spatial distribution of the eleven TRANSCOM-land regions. NA: North America, SA: South America, N: Northern, S: Southern, Temp.: Temperate, Bor.: Boreal, Trop.: Tropical.

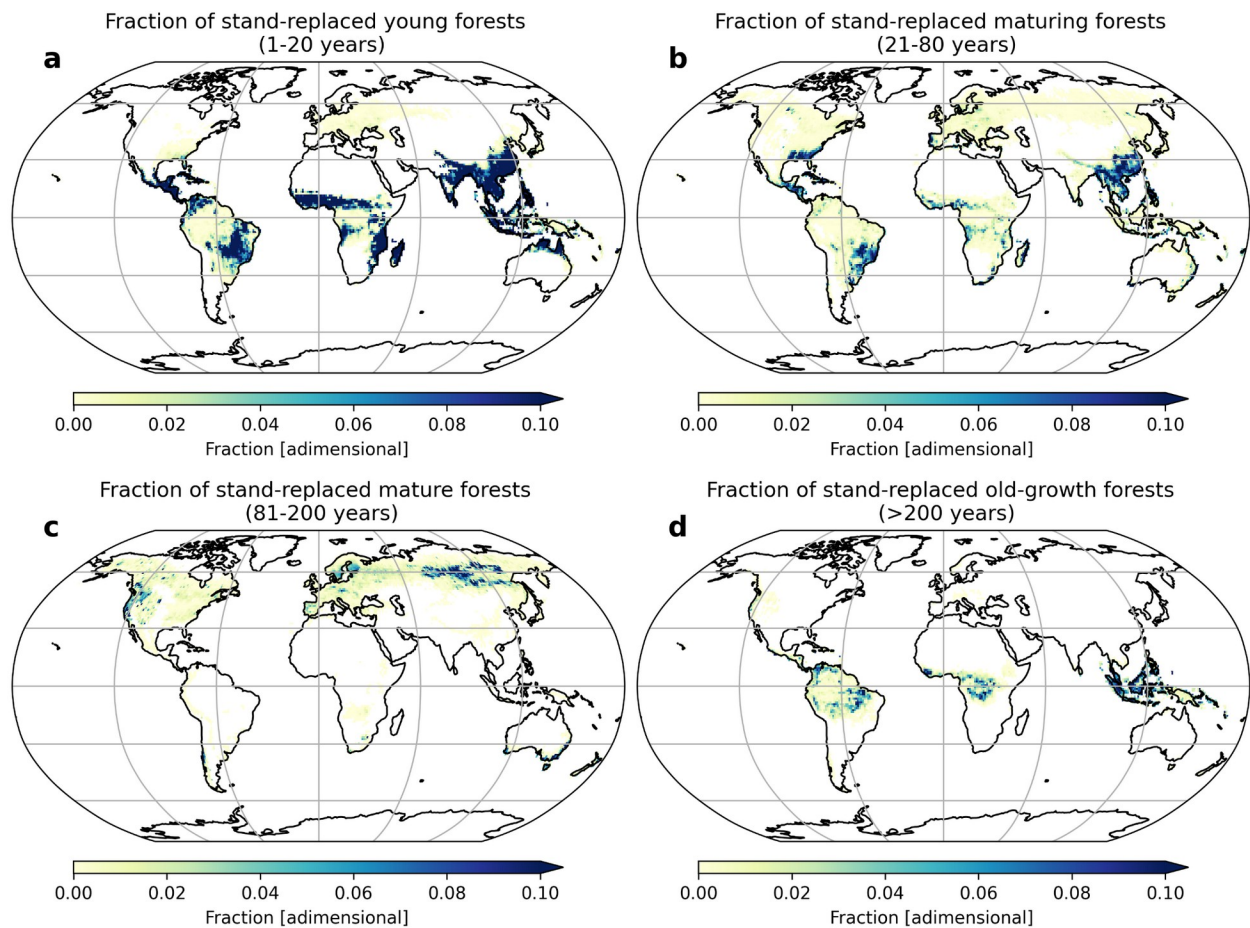

**Fig. S5.** Spatial distribution of stand-replaced forests that were (a) young (forest age  $\leq 20$  years old), (b) intermediate (21-80 years old), (c) mature (81-200 years old), and (d) old-growth forests (forest age  $> 200$  years old) in 2010.

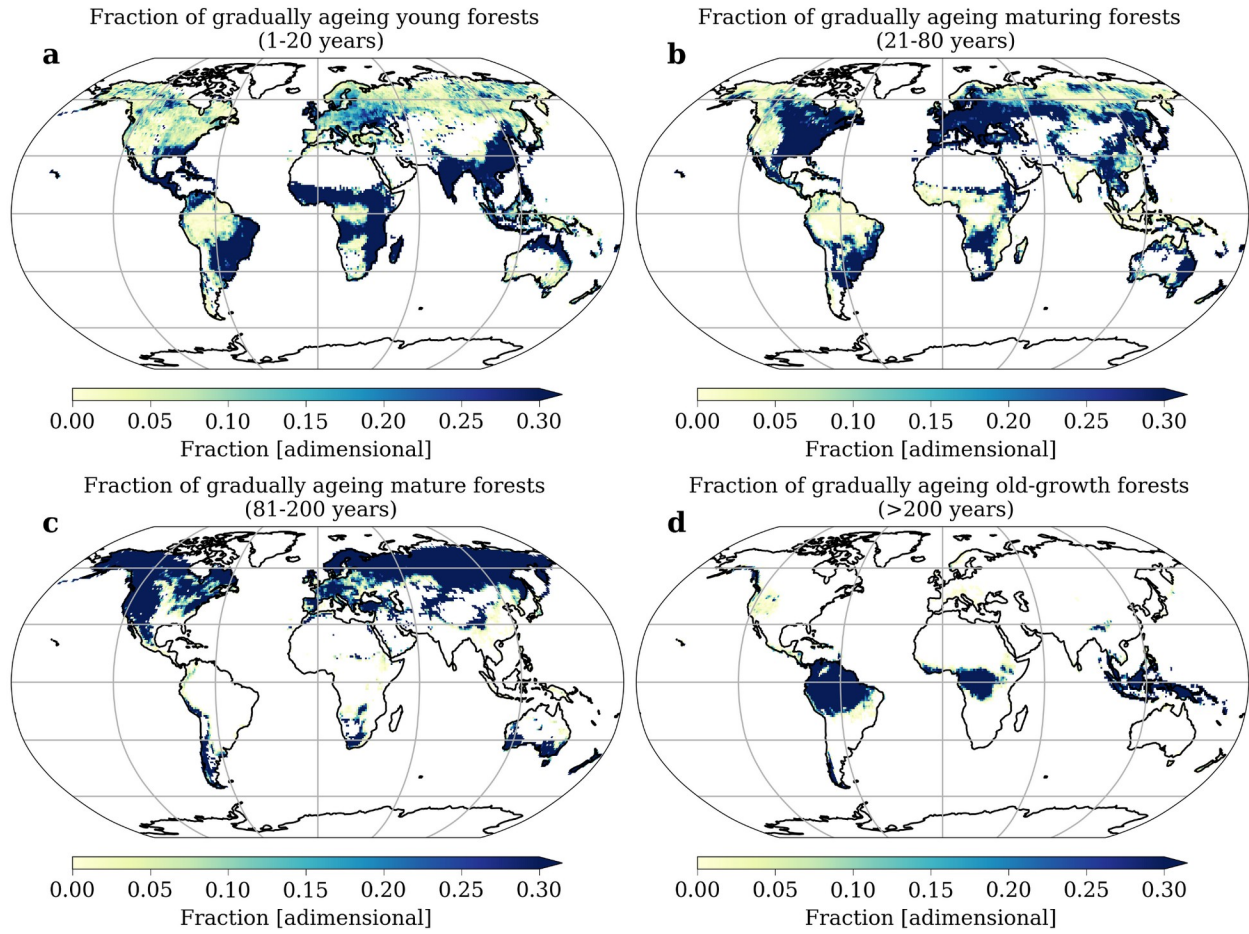

**Fig. S6.** Spatial distribution of gradually ageing forests (a) young (forest age  $\leq 20$  years old), (b) intermediate (21-80 years old), (c) mature (81-200 years old), and (d) old-growth forests (forest age  $> 200$  years old) in 2010.



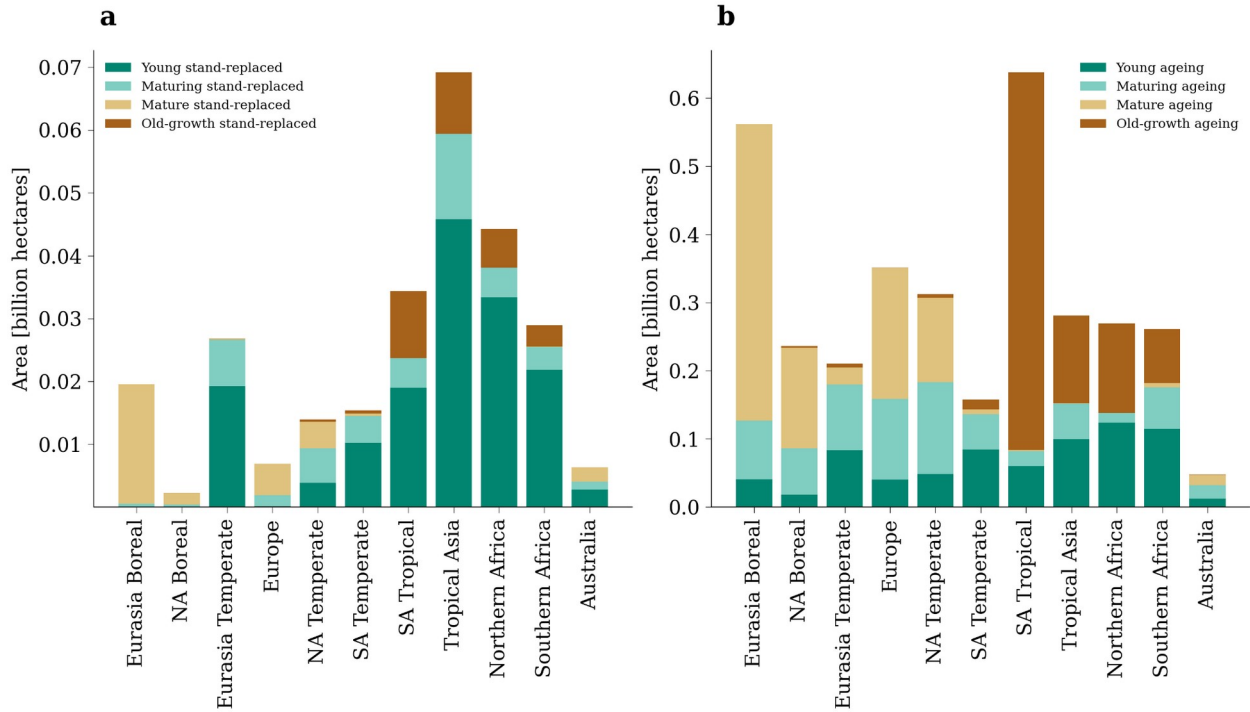

**Fig. S7.** Total area (in billion hectares) of (a) stand-replaced and (b) gradually ageing forests per age class across the eleven TRANSCOM-land regions (Fig. S3).

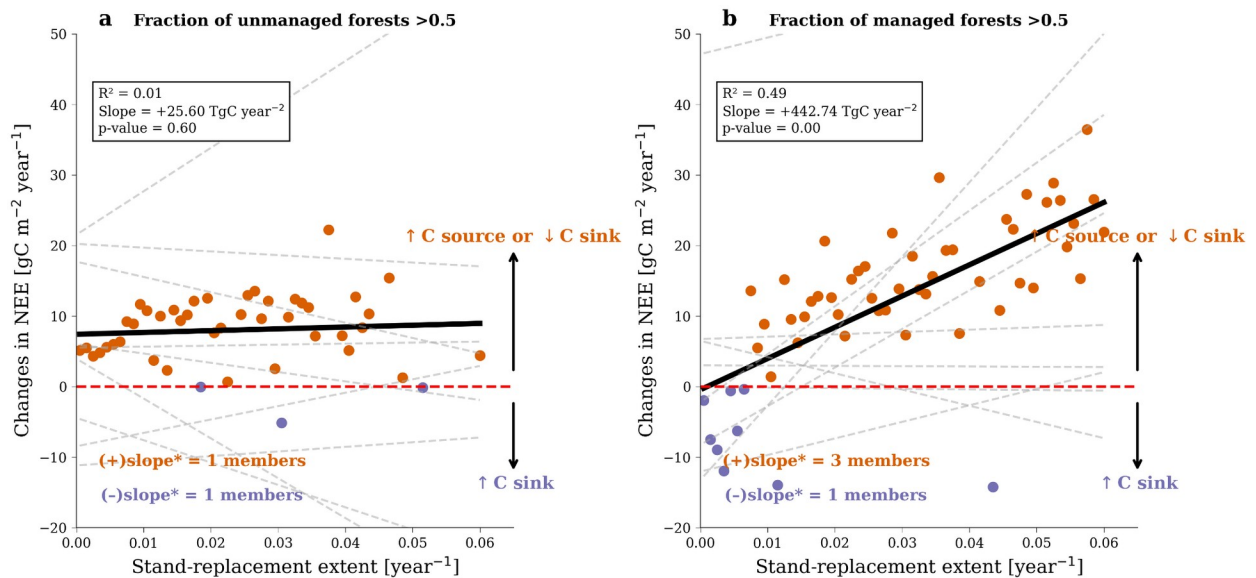

**Fig. S8.** The relationships between the total area of stand-replaced relative to gradually ageing forests (i.e., stand-replacement extent) against the changes in net  $\text{CO}_2$  fluxes between circa 2020 (average between 2019-2021) and 2010 (average between 2009-2011) for unmanaged (i.e., the fraction of unmanaged forests >0.5 within one-degree pixel) (a) and managed (b) forests (i.e., the fraction of managed forests >0.5 within one-degree pixel).

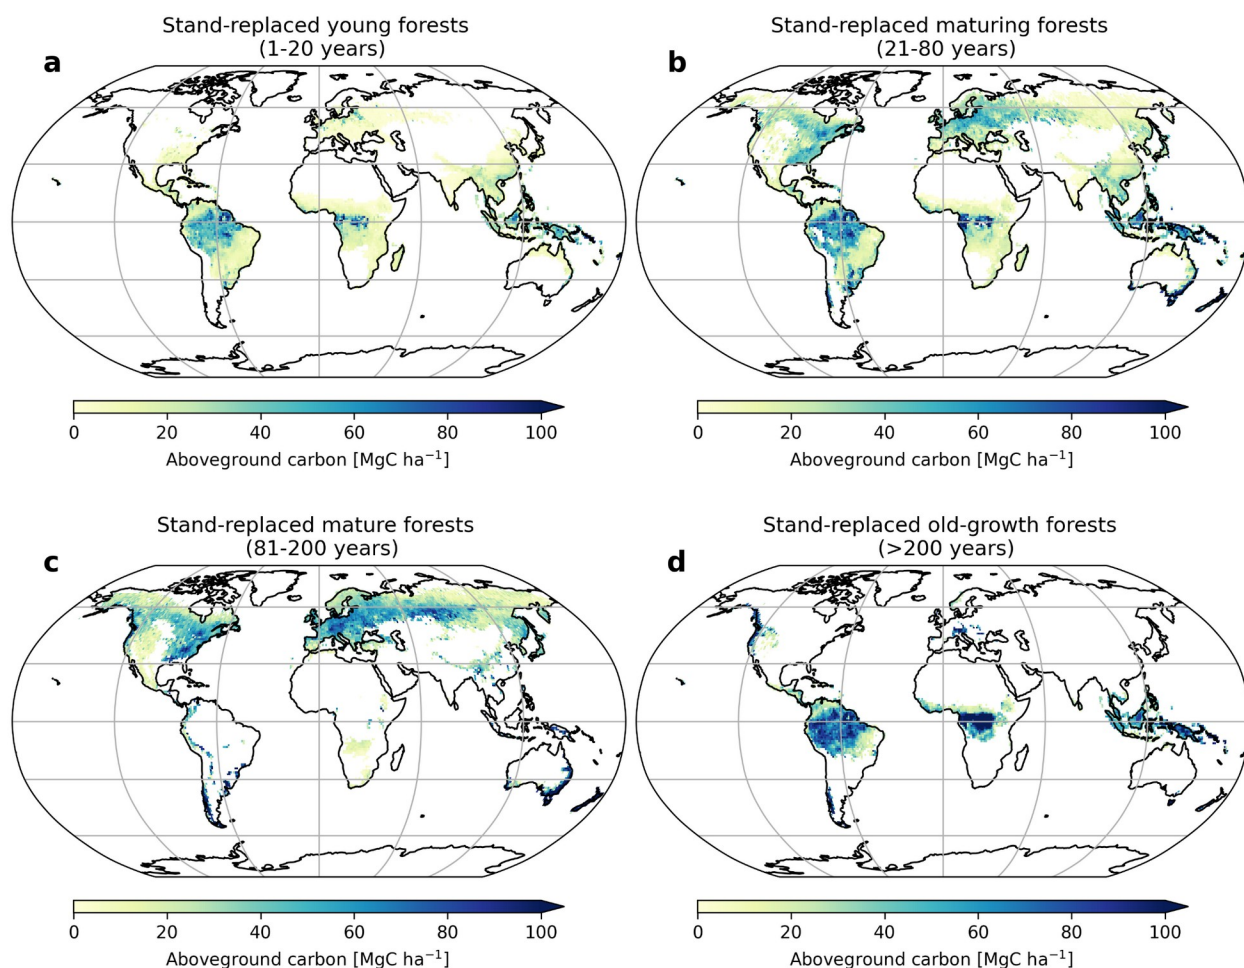

**Fig. S9.** Spatial distribution of carbon stocks (in  $\text{MgC ha}^{-1}$ ) in stand-replaced forests (a) young (forest age  $\leq 20$  years old), (b) intermediate (21-80 years old), (c) mature (81-200 years old), and (d) old-growth forests (forest age  $> 200$  years old) in 2010. Each pixel represents a median estimate of the 100m pixels belonging to a specific category within each one-degree pixel.

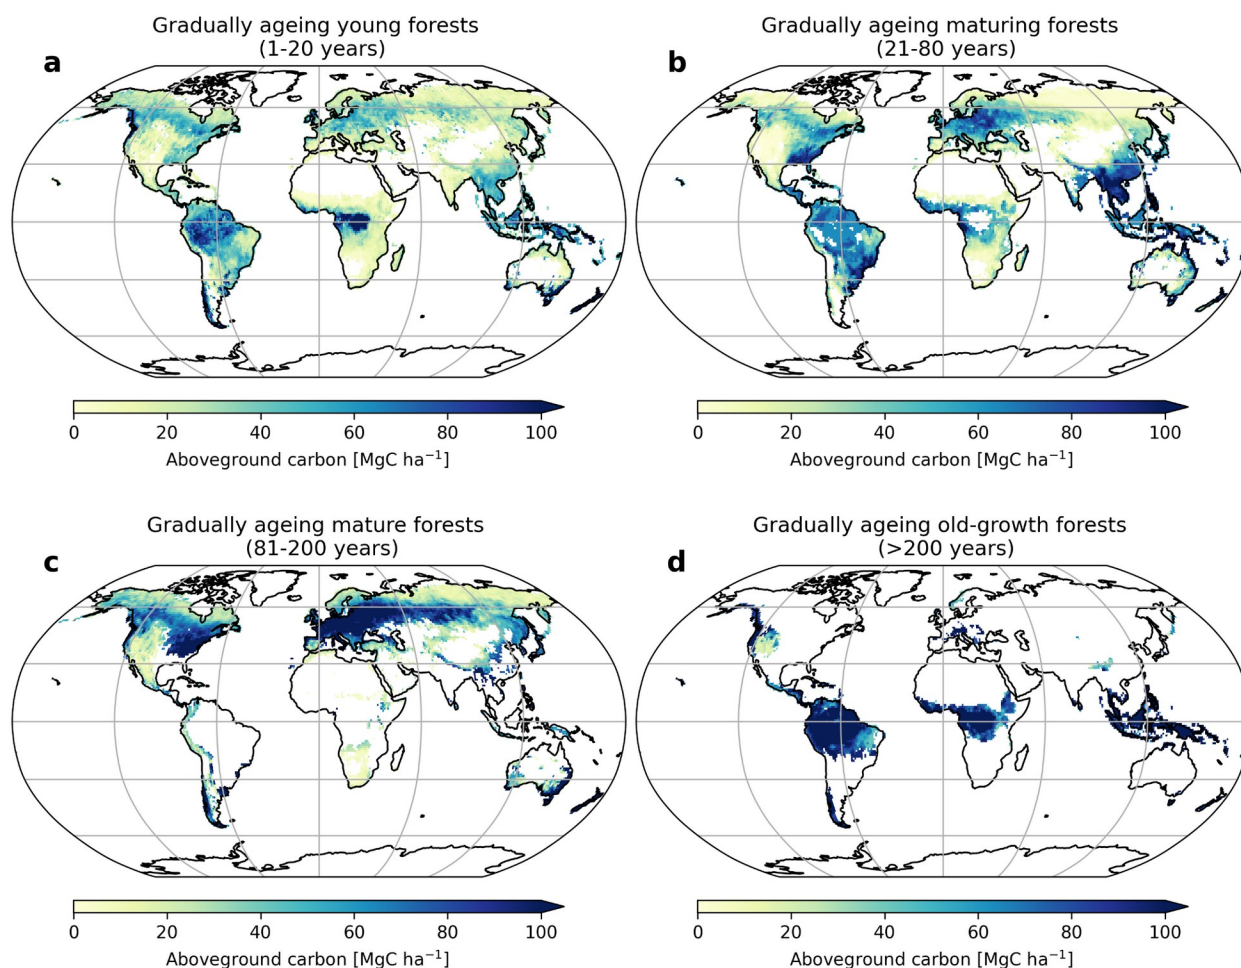

**Fig. S10.** Spatial distribution of carbon stocks (in  $\text{MgC ha}^{-1}$ ) in gradually ageing established forests (a) young (forest age  $\leq 20$  years old), (b) intermediate (21-80 years old), (c) mature (81-200 years old), and (d) old-growth forests (forest age  $> 200$  years old) in 2010. Each pixel represents a median estimate of the 100m pixels belonging to a specific category within each one-degree pixel.

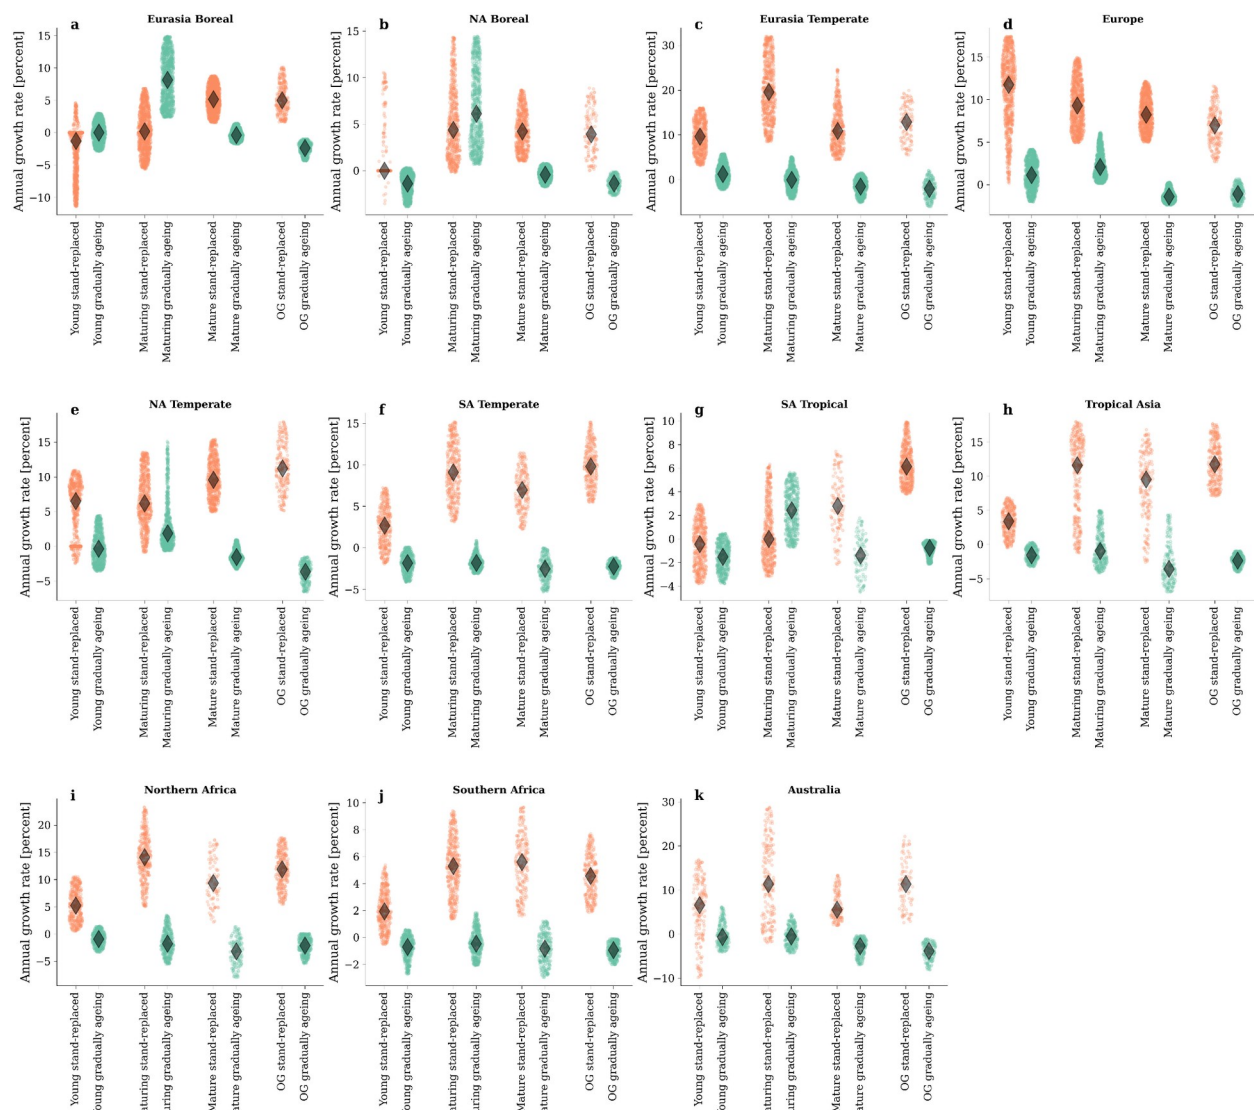

74

75 **Fig. S11.** Annual growth rates across age classes for stand-replaced forests for each  
 76 TRANSCOM-Land region.



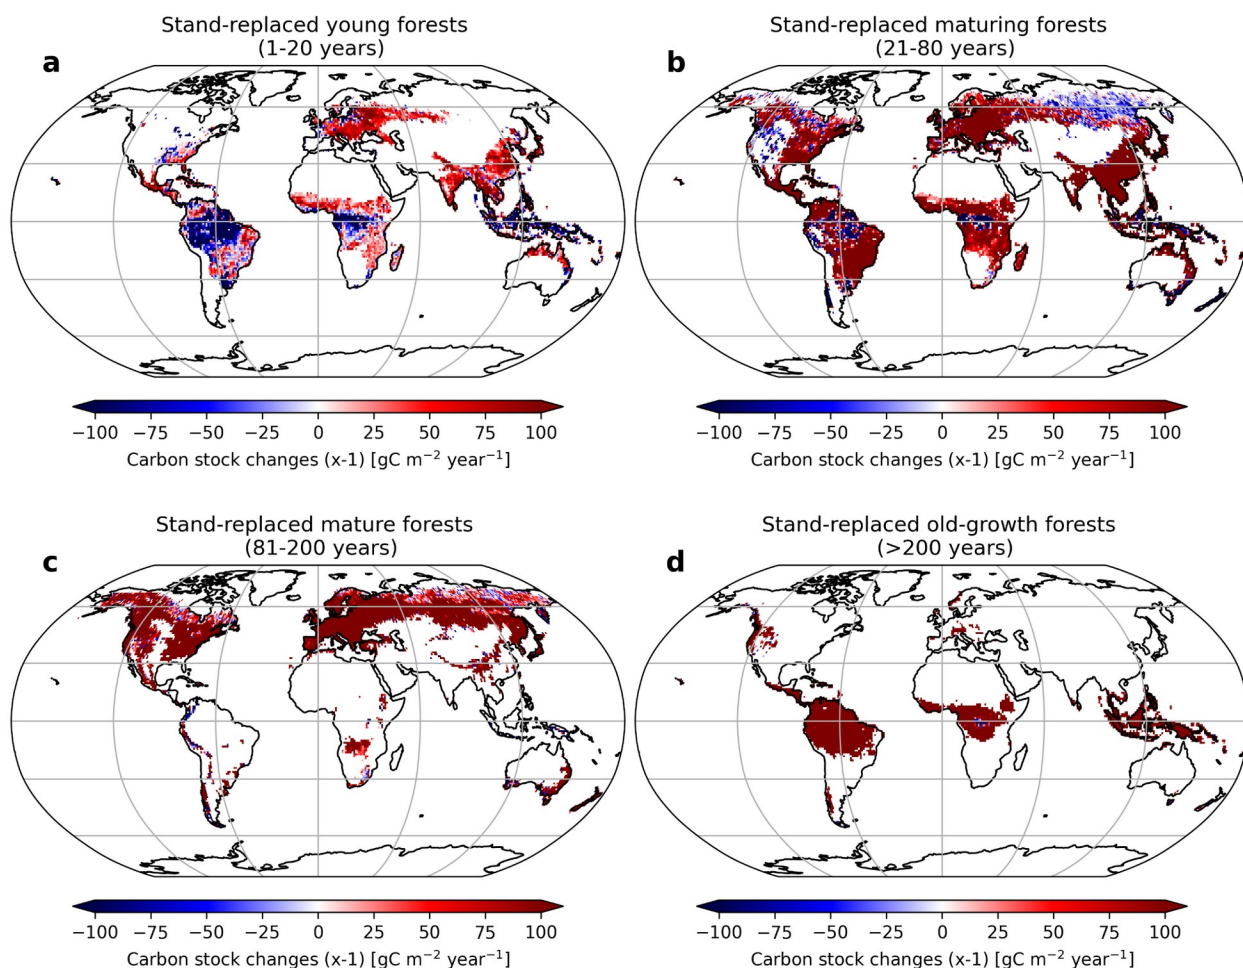

**Fig S12.** Spatial distribution of carbon stock changes (in  $\text{gC m}^{-2} \text{ year}^{-1}$ ) in stand-replaced forests (a) young (forest age  $\leq 20$  years old), (b) intermediate (21-80 years old), (c) mature (81-200 years old), and (d) old-growth forests (forest age  $> 200$  years old) in 2010. Each pixel represents a median estimate of the 100m pixels belonging to a specific category within each one-degree pixel.

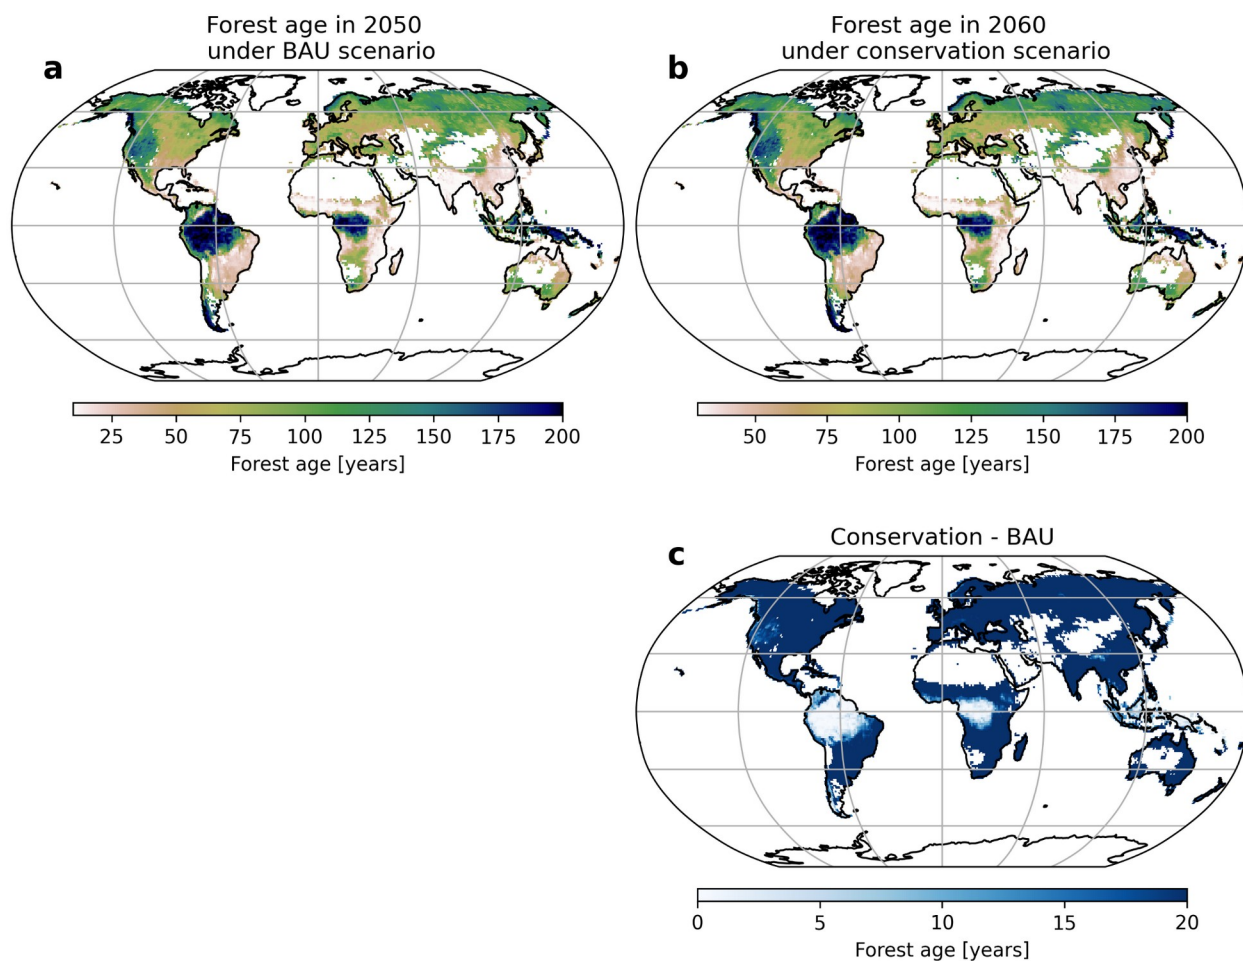

**Fig. S13.** Weighted-area average forest age for the (a) BAU and (b) forest conservation scenarios in 2050. The (c) difference between the forest age maps is also shown.

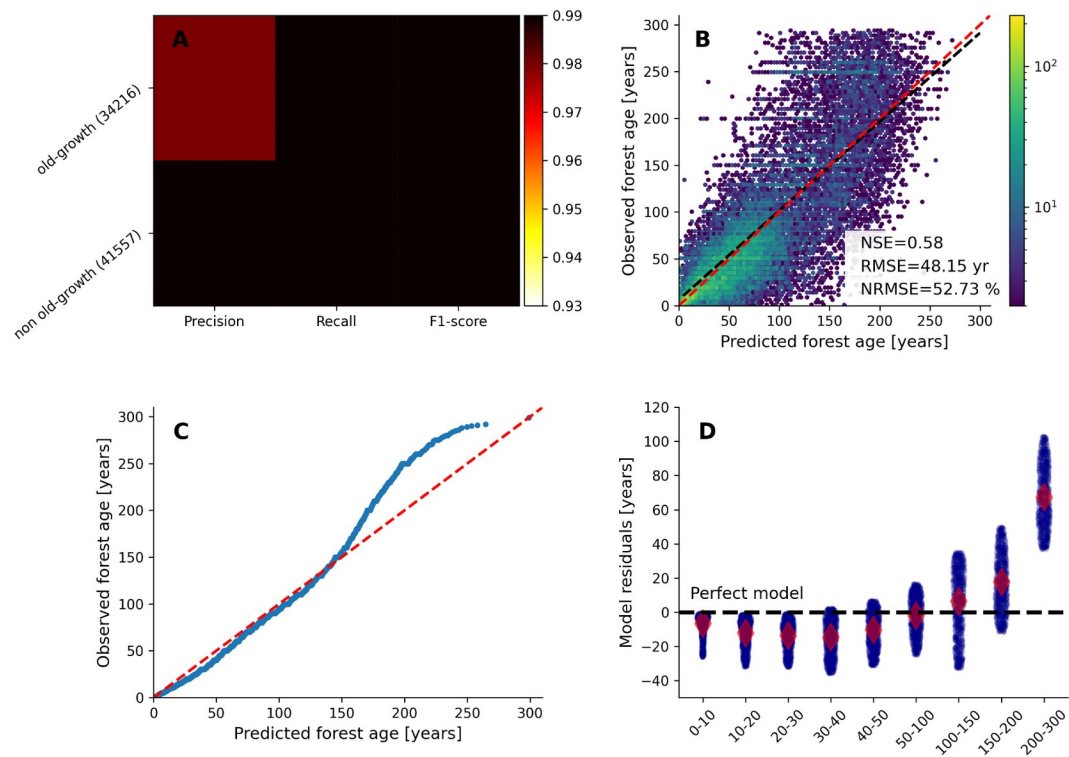

**Fig. S14.** Cross-validated results of the old-forest vs. non-old-forest classification (a) and comparison of predicted vs. observed forest age estimates from the regression model (b). The quantile-quantile plot (c) and the model residuals across age classes (d) are also shown.

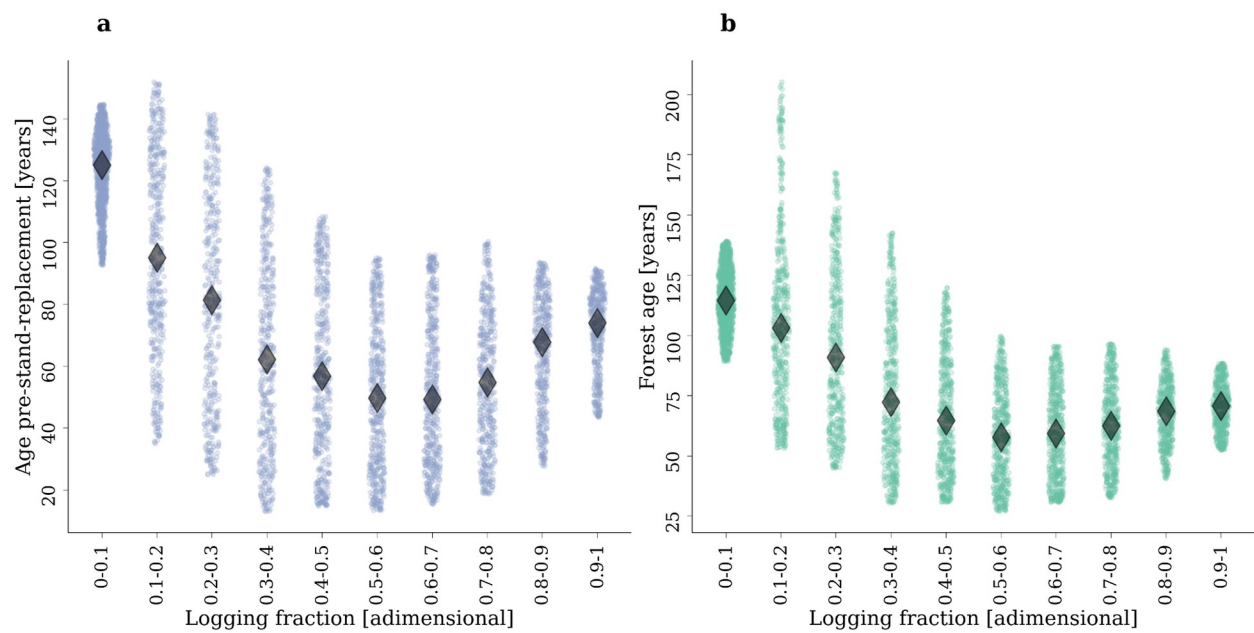

**Fig. S15.** Logging fraction against age pre-stand-replacement (a) and forest age (b).

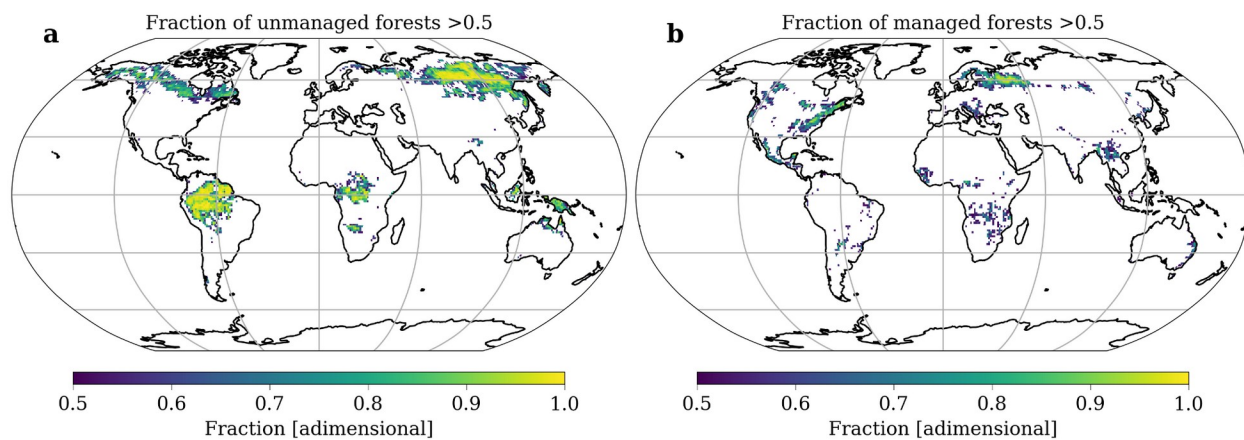

**Fig. S16.** Spatial patterns of (a) the unmanaged forests (fraction>0.5 within one-degree pixel) and (b) the managed forests (fraction>0.5 within one-degree pixel).
